# Supplementary material
Source: bioRxiv or medRxiv preprint supplement (https://www.biorxiv.org/highwire/filestream/2256/field_highwire_adjunct_files/9/008862-18.pdf)
Supplement: Supplementary file [file 008862-18.pdf]

# Color Key and Histogram

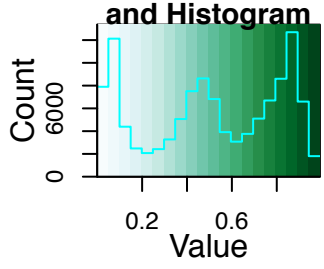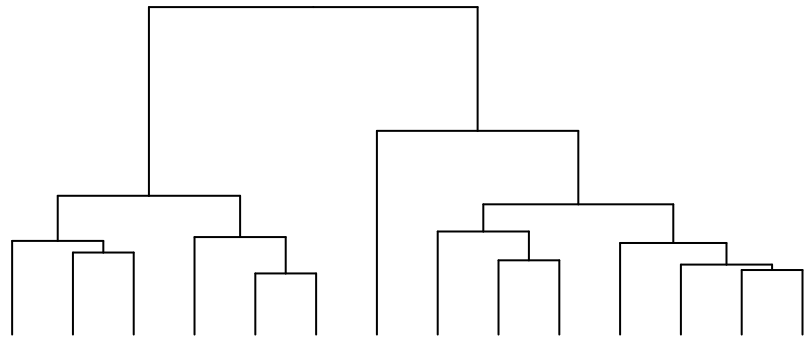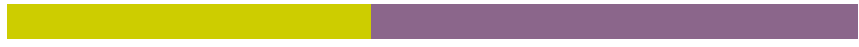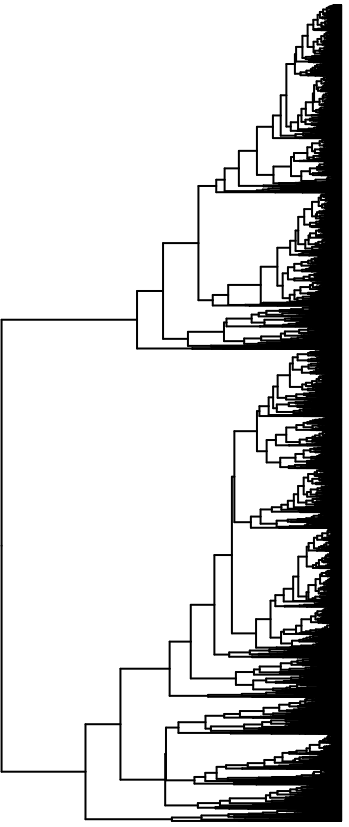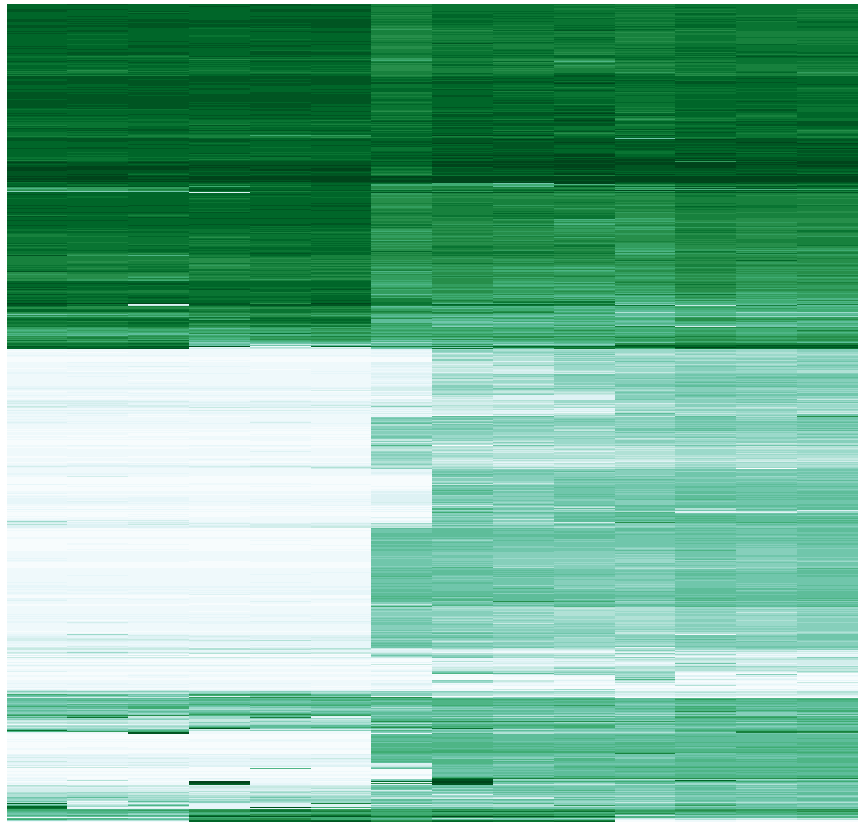

C-4955D  
C8861G  
C3649K  
H19101  
H20961  
Hutt45  
H19114  
H18489  
Hutt60  
H28834  
C3651D  
C3647B1  
C40280L  
C40210A
